# Supplementary material
Source: publisher figshare collection journal article supplement (https://karger.figshare.com/ndownloader/files/23293622)
Supplement: Supplementary file 1 [file 23293622]

**Supplementary file 1** The sequences of primers used in RT-qPCR

CASC9: 5ʹ-TTGGTCAGCCACATTCATGGT-3ʹ (forward);

CASC9: 5ʹ-AGTGCCAATGACTCTCCAGC-3ʹ (reverse);

miR-497-5p: 5′-CCTTCAGCAGCA CACTGTGG-3′ (forward);

miR-497-5p: 5′-CAGTGCAGGGT CCGAGGTAT-3′ (reverse);

CBX2: 5′-ATCGAGCACGTATTTGTCAC-3′ (forward);

CBX2: 5′-AGTAATGCCTCAGGTTGAAG-3′ (reverse);

miR-195-5p: 5ʹ- GCGTAGCAGCACAGAAATATTGGC -3ʹ(forward);

miR-195-5p:5ʹ- CTGTCGTCGTAGAGCCAGGGAA -3ʹ(reverse);

miR-365a-3p: 5ʹ- GCCCCTAAAAATCCTT -3ʹ(forward);

miR-365a-3p: 5ʹ- GTGCAGGGTCCGAGGT -3ʹ(reverse);

miR-365b-3p: 5ʹ- TAATGCCCCTAAAAAT -3ʹ (forward);

miR-365b-3p: 5ʹ- CCAGTGCAGGGTCCGAGGT-3ʹ (reverse);

miR-874-3p：5ʹ- -GAACTCCACTGTAGCA GAGATGGT -3ʹ (forward);

miR-874-3p：5ʹ- CATTTTTTCCACTCCTCTTCTCTC -3ʹ (reverse);

miR-146b-5p：5ʹ- GCGCAGTGAGAACTGAATTCCA -3ʹ (forward);

miR-146b-5p：5ʹ- AGTGCGTGTCGTGGAGTCG-3ʹ (reverse);

SPRYD3：5ʹ- GTCTGTGGCTTATCATGCAGAC-3ʹ (forward);

SPRYD3：5ʹ- ATTCCACAGCCCATGATGTC-3ʹ (reverse);

SNCG：5ʹ- GGAGGACTTGAGGCCATCTG -3ʹ (forward);

SNCG：5ʹ- CTCCTCTGCCACTTCTCTTTTC-3ʹ (reverse);

TBRG1：5ʹ- GCGGCTGCGCAAAGC-3ʹ (forward);

TBRG1：5ʹ- TCATCACAAATAGCAGCATTTT-3ʹ (reverse);

LITAF：5ʹ- TGTGTATGTGCAGCAACCCGTAGT -3ʹ (forward);

LITAF：5ʹ- GGCATTGCAATTTGGACAGAAGT -3ʹ (reverse);
